# Supplementary material for: Liver X Receptor β Related to Tumor Progression and Ribosome Gene Expression in Papillary Thyroid Cancer
Source: PubMed Central journal article supplement — Endocrinol Metab (Seoul). 2020 Aug 20;35(3):656–68. doi: 10.3803/EnM.2020.667 (PMC7520597; doi:10.3803/enm.2020.667), 2020-08-20
Supplement: enm-2020-667-suppl.pdf [file enm-2020-667-suppl.pdf]

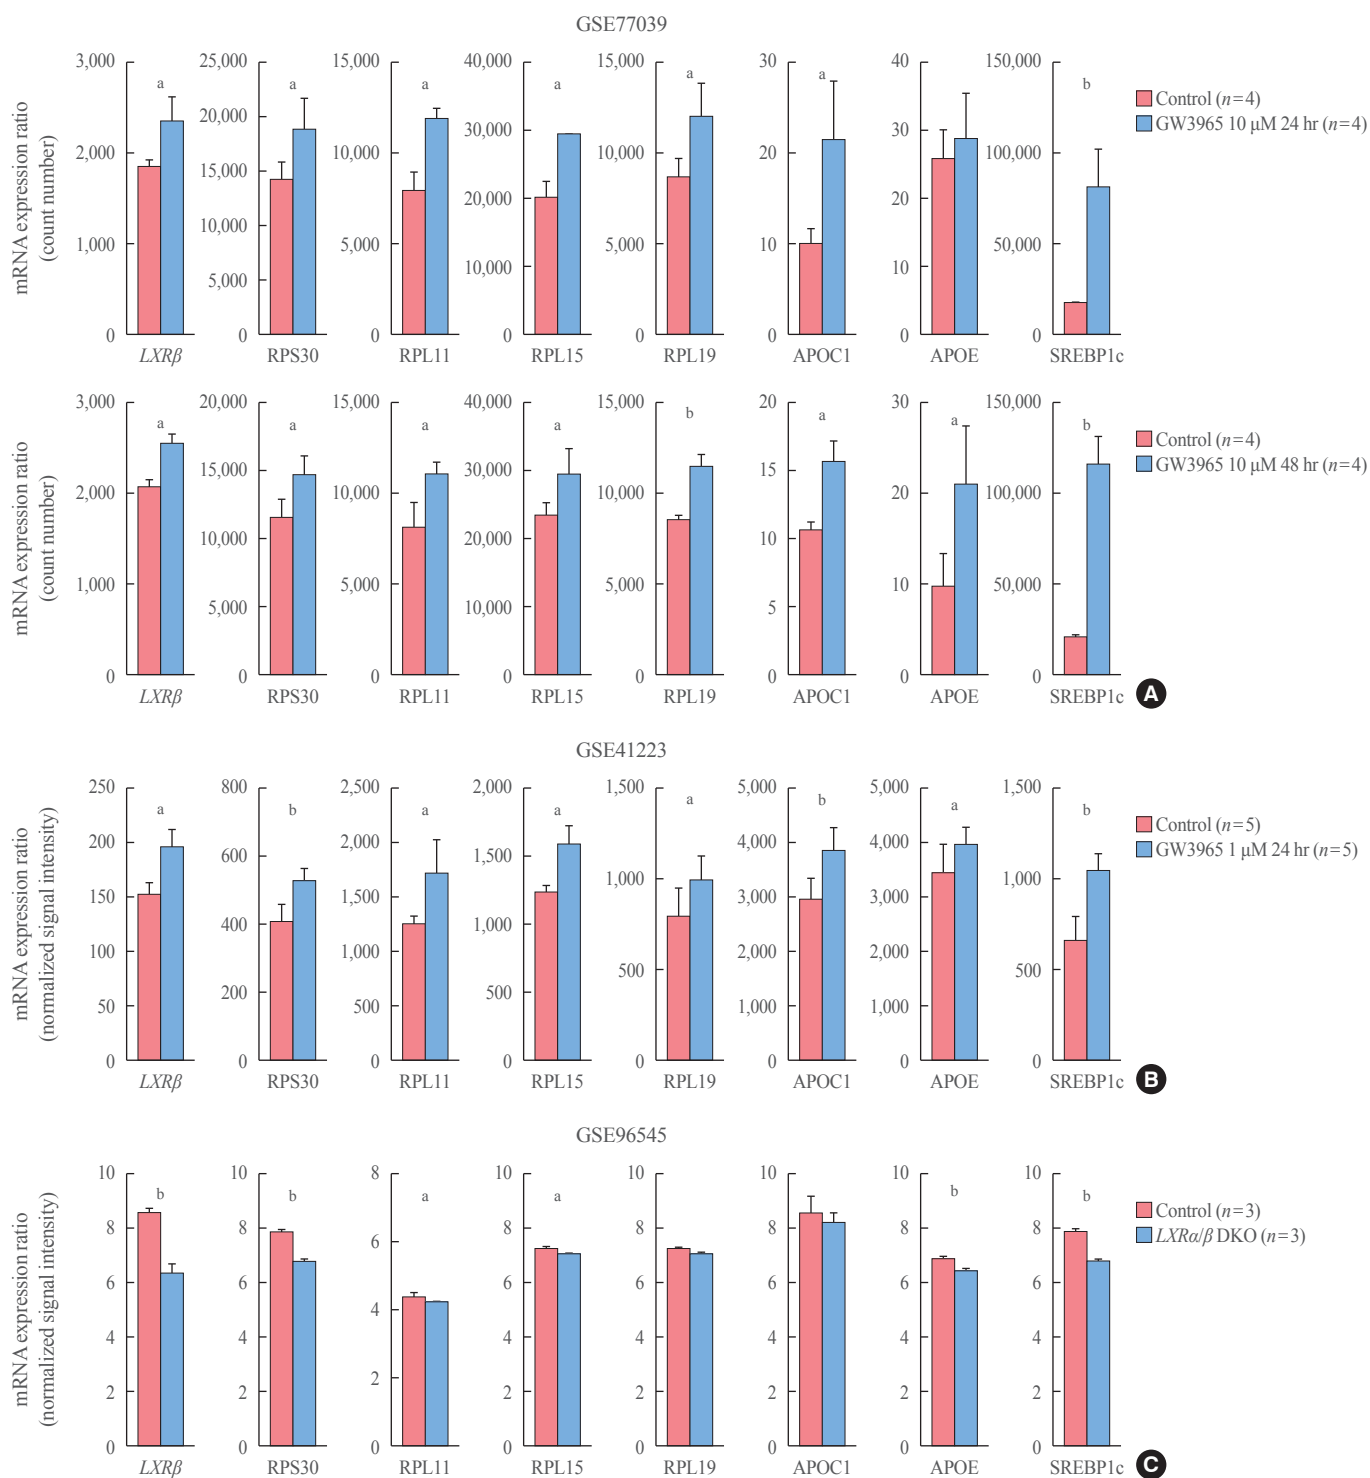

**Supplemental Fig. S1.** Gene Expression Omnibus (GEO) data set results related to Fig. 4B. (A) RNA sequencing experiment was performed using HT29 colorectal adenocarcinoma cell lines treated with DMSO or GW3965. (B) Preadipocytes were isolated from human subcutaneous adipose tissue, fully differentiated and treated for 24 hours with DMSO or GW3965. (C) Microarray was performed using non-tumor dorsal prostate tissue from liver X receptor  $\alpha/\beta$  (*LXR $\alpha/\beta$* ) knockout mice. Data are presented as mean  $\pm$  standard deviation. Mean comparisons were analyzed by Wilcoxon signed rank test. RPS30, ribosomal protein S30; RPL11, ribosomal protein L11; RPL15, ribosomal protein L15; RPL19, ribosomal protein L19; APOC1, apolipoprotein C1; APOE, apolipoprotein E; SREBP1c, sterol regulatory element-binding protein 1c. <sup>a</sup> $P < 0.05$ ; <sup>b</sup> $P < 0.001$ .
